# Supplementary material
Source: publisher figshare collection journal article supplement (https://acs.figshare.com/ndownloader/files/4506799)

# **Cycloisomerization of Aromatic Homo- and bis-Homopropargylic Alcohols via Catalytic Ru-Vinylidenes: Formation of Benzofuranes and Isochromenes**

Alejandro Varela-Fernández, Carlos González-Rodríguez, Jesús A. Varela, Luis Castedo and Carlos Saá\*

*Departamento de Química Orgánica, Facultad de Química, Universidad de Santiago de Compostela, 15782 Santiago de Compostela, Spain*

## **Supporting Information**

### **Index**

|                                                                            |            |
|----------------------------------------------------------------------------|------------|
| <b>I. General</b>                                                          | <b>S2</b>  |
| <b>II. Preparation of starting materials and catalysts</b>                 | <b>S2</b>  |
| <b>III. Optimization of the Ru-catalyzed cycloisomerization conditions</b> | <b>S3</b>  |
| <b>IV. General procedure for the Ru-catalyzed reaction</b>                 | <b>S3</b>  |
| <b>V. Isotopic labeling experiments</b>                                    | <b>S3</b>  |
| <b>VI. Spectral data</b>                                                   | <b>S5</b>  |
| <b>VII. Spectra</b>                                                        | <b>S11</b> |

## I. General

Solvents THF, Et<sub>3</sub>N, <sup>i</sup>Pr<sub>2</sub>NH and MeOH were used after distillation. All other reagents were used as received without further purification, unless otherwise noted. All reactions were carried out under argon atmosphere in flame-dried glassware with magnetic stirring, unless otherwise indicated.

## II. Preparation of starting materials and catalysts

- Aromatic alkynols **1a**,<sup>1</sup> **1d**,<sup>1</sup> **9b**,<sup>1</sup> **9d**<sup>1</sup> were prepared following published procedures or with appropriate modifications.
- Aromatic alkynols **1b** and **1c** were prepared in three steps in 71% and 61% overall yields, respectively: a) Sonogashira coupling of methyl-2-bromo-5-chlorobenzoate and methyl-2-bromo-5-methoxybenzoate with trimethylsilylacetylene (1.5 equiv) using Pd(OAc)<sub>2</sub> (0.02 equiv), Ph<sub>3</sub>P (0.05 equiv) and CuI (0.03 equiv) in Et<sub>3</sub>N at 90°C; b) reduction with LiAlH<sub>4</sub> (1.4 equiv) in THF; c) desilylation with TBAF (1.25 equiv) in THF.
- Aromatic alkynol **1e** was prepared in three steps in 86% overall yield: a) Sonogashira coupling of 1-(2-iodophenyl)ethanone with trimethylsilylacetylene (1.5 equiv) using Pd(PPh<sub>3</sub>)<sub>2</sub>Cl<sub>2</sub> (0.02 equiv) and CuI (0.03 equiv) in THF/Et<sub>3</sub>N at rt; b) reduction with NaBH<sub>4</sub> (1 equiv) in MeOH; c) desilylation with TBAF (1.25 equiv) in THF.
- Aromatic alkynols **1f** and **1g** were prepared in three steps in 48% and 86% overall yields, respectively: a) Sonogashira coupling of 2-iodobenzaldehyde and 1-(2-iodophenyl)ethanone with trimethylsilylacetylene (1.5 equiv) using Pd(PPh<sub>3</sub>)<sub>2</sub>Cl<sub>2</sub> (0.02 equiv) and CuI (0.03 equiv) in THF/Et<sub>3</sub>N at rt; b) desilylation with TBAF (1.25 equiv) in THF; c) addition of allylmagnesium chloride (1.5 equiv) and methylmagnesium iodide (2 equiv) in THF, respectively.
- 2-Ethynylbenzoic acid **3** was prepared in three steps in 20% overall yield: a) esterification of 2-iodobenzoic acid in MeOH with H<sub>2</sub>SO<sub>4</sub>; b) Sonogashira coupling of the ester obtained with trimethylsilylacetylene (1.5 equiv) using Pd(PPh<sub>3</sub>)<sub>2</sub>Cl<sub>2</sub> (0.02 equiv) and CuI (0.03 equiv) in THF/Et<sub>3</sub>N at rt; c) ester saponification and desilylation with NaOH in MeOH.
- Alkynol **5** was prepared in three steps in 32% overall yield: a) silylation of pent-4-yn-1-ol by treatment with n-BuLi (2.1 equiv) and TMSCl (2.2 equiv) in THF; b) Swern oxidation of the resulting alcohol; c) addition of hexylmagnesium chloride (1 equiv) in THF.
- 2,2-Di(prop-2-ynyl)propane-1,3-diol **7** was prepared in 70% overall yield by reduction of dimethyl 2,2-di(prop-2-ynyl)malonate<sup>2</sup> with LiAlH<sub>4</sub> (2.8 equiv) in THF.

<sup>1</sup> Kabalka, G. W.; Wang, L.; Pagni, R. M. *Tetrahedron* **2001**, 57, 8017.

<sup>2</sup> Trost, B. M.; Rudd, M. T. *J. Am. Chem. Soc.* **2005**, 127, 4763.

- Phenol **9a** was prepared in three steps in 34% overall yield: a) Sonogashira coupling of 3-hydroxy-2-iodo-4-methoxybenzaldehyde with trimethylsilylacetylene (1.5 equiv) using  $\text{Pd}(\text{PPh}_3)_2\text{Cl}_2$  (0.10 equiv) and  $\text{CuI}$  (0.10 equiv) in  $\text{THF}/i\text{Pr}_2\text{NH}$  at  $40^\circ\text{C}$ ; b) reduction with  $\text{NaBH}_4$  (1.5 equiv) in  $\text{MeOH}$ ; c) desilylation with TBAF (1.25 equiv) in  $\text{THF}$ .
- Phenol **9c** was prepared in three steps in 50% overall yield: a) iodination of 4-hydroxybenzonitrile with  $\text{KI}$  (2 equiv),  $\text{I}_2$  (1 equiv),  $\text{NH}_4\text{OH}$  (1 equiv) in  $\text{H}_2\text{O}$ ;<sup>3</sup> b) Sonogashira of the resulting aryl iodide with trimethylsilylacetylene (1.5 equiv) using  $\text{Pd}(\text{PPh}_3)_2\text{Cl}_2$  (0.02 equiv) and  $\text{CuI}$  (0.03 equiv) in  $\text{THF}/\text{Et}_3\text{N}$  at rt; c) desilylation with TBAF (1.25 equiv) in  $\text{THF}$ .
- $\text{CpRuCl}(\text{PPh}_3)_2$ ,<sup>4</sup>  $\text{CpRuCl}(\text{dppm})$ <sup>5</sup> and  $[\text{Cp}^*\text{Ru}(\text{CH}_3\text{CN})_3]\text{PF}_6$ <sup>6</sup> were prepared following literature procedures.  $\text{Cp}^*\text{RuCl}(\text{PPh}_3)_2$ ,  $(\eta^5\text{-indenyl})\text{RuCl}(\text{PPh}_3)_2$  and  $\text{TpRuCl}(\text{PPh}_3)_2$  were used as received from commercial suppliers.

### III. Optimization of the Ru-catalyzed cycloisomerization conditions

- *Catalyst*: Ru-catalyzed reaction of bis-homopropargylic alcohol **1a** using 10% of  $\text{Cp}^*\text{RuCl}(\text{PPh}_3)_2$ ,  $\text{TpRuCl}(\text{PPh}_3)_2$ ,  $\text{CpRuCl}(\text{dppm})$  or  $[\text{Cp}^*\text{Ru}(\text{CH}_3\text{CN})_3]\text{PF}_6$  failed to give the cycloisomerized product, with recovery of **1a** unaltered. When  $\eta^5\text{-(indenyl)RuCl}(\text{PPh}_3)_2$  was used as catalyst, isochromene **2a** was obtained in a low 15% yield.
- *Amines*: Ru-catalyzed cycloisomerization of **1a** in  $i\text{PrNH}_2$  gave a low 25% yield of **2a**. Secondary amines like  $i\text{Pr}_2\text{NH}$  and pyrrolidine, tertiary amines like  $\text{Et}_3\text{N}$  and 2,2'-bipyridine failed to afford **2a**, with recovery of **1a** unaltered.

### IV. General conditions for the Ru-catalyzed reaction

Aromatic alkynols were added to a suspension of the Ru catalyst (10% mmol) in the solvent (0.15 M) and the mixture heated in an oil-bath at  $90\text{--}130^\circ\text{C}$  until disappearance of the starting alkynol (GC and TLC monitoring). After reaching rt, the mixture was concentrated and the resulting residue was chromatographed on silica gel using  $\text{Et}_2\text{O}/\text{hexane}$  as eluents to afford the final cycloisomerized products.

### V. Isotopic labeling experiments

Deuterated alkyne **1a'** (obtained by reaction of **1a** with  $\text{NaH}$  in  $\text{THF}$  followed by sequential quenching with  $\text{D}_2\text{O}$  and  $\text{MeOH}$ ) was heated in pyridine for 30 min at  $90^\circ\text{C}$  until a stationary mixture of **1a'** and deuterated alcohol **1a''** was obtained in 3:7 ratio (Scheme 1). Then,  $\text{CpRuCl}(\text{PPh}_3)_2$  was added to the reaction mixture to give a 3:7 mixture of isochromenes **2a'** and **2a''** (Scheme 1).

<sup>3</sup> Sun, M.; Cowart, M. *J. Med. Chem.* **2005**, *48*, 6482.

<sup>4</sup> Bruce, M. I.; Windsor, N. J. *Aust. J. Chem.* **1977**, *30*, 1601.

<sup>5</sup> Ashby, G. S.; M. I. Tomkins, I. B.; Wallis, R. C. *Aust. J. Chem.* **1979**, *32*, 1003.

<sup>6</sup> a) Trost, B. M.; Older, C. M. *Organometallics* **2002**, *21*, 2544. b) Schrenk, J. L.; McNair, A. M.; McCormick, F. B. Mann, K. R. *Inorg. Chem.* **1986**, *25*, 3501.

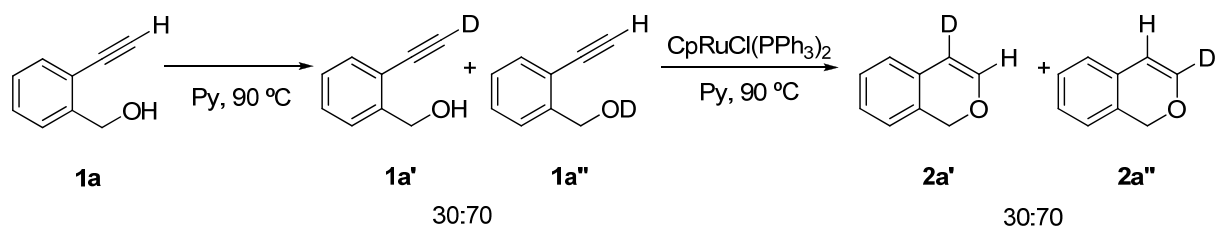

Scheme 1

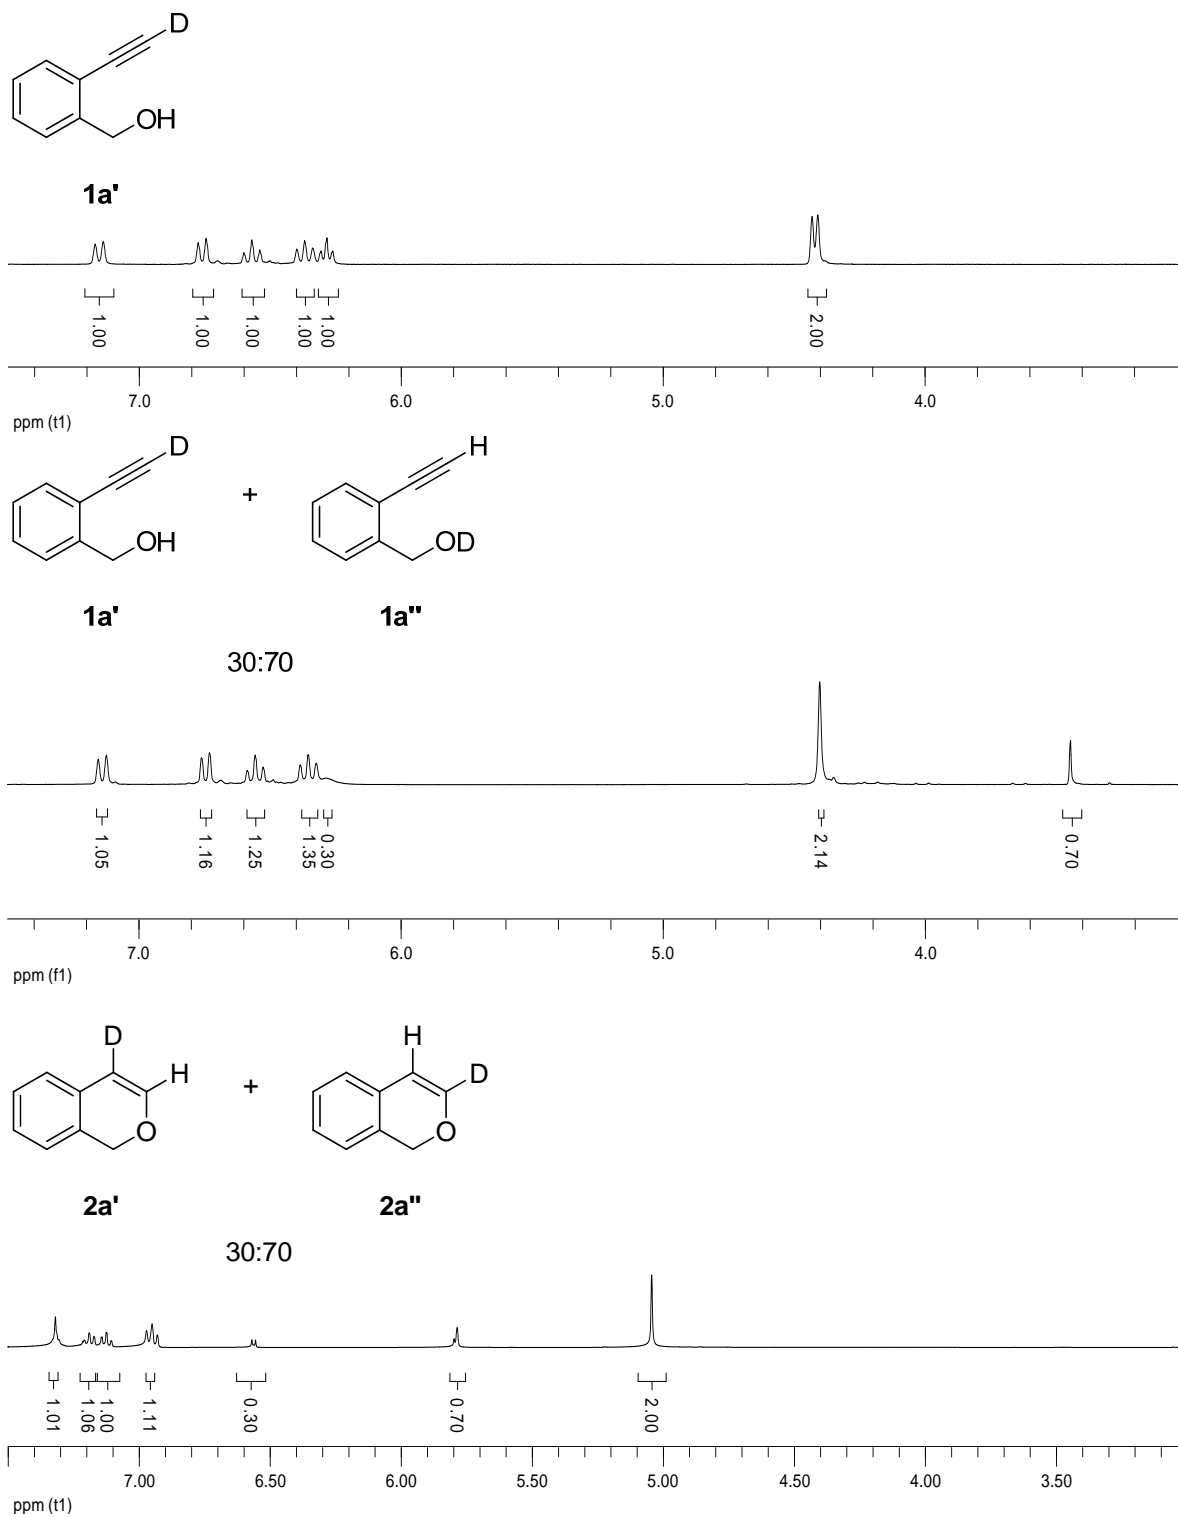

## VI. Spectral data

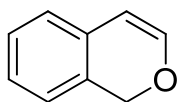

**2a**

### 1H-isochromene (2a)

Brown oil.  $^1\text{H}$  NMR (300 MHz,  $\text{CDCl}_3$ ),  $\delta$  (ppm): 7.28-7.09 (m, 2H), 6.96 (t,  $J = 7.6$  Hz, 2H), 6.57 (d,  $J = 5.7$  Hz, 1H), 5.80 (d,  $J = 5.7$  Hz, 1H), 5.05 (s, 2H).  $^{13}\text{C}$  NMR, DEPT (75 MHz,  $\text{CDCl}_3$ ),  $\delta$  (ppm): 146.2 (CH), 130.4 (C), 128.1 (CH), 128.0 (C), 126.6 (CH), 123.9 (CH), 122.8 (CH), 105.4 (CH), 68.1 ( $\text{CH}_2$ ). MS,  $m/z$  (% relative intensity): 133 ( $\text{M}^+ + 1$ , 100), 132 (16), 105 (39). HRMS (CI) calculated for  $\text{C}_9\text{H}_9\text{O}$  [ $\text{M}^+ + 1$ ]: 133.0653; found: 133.0653.

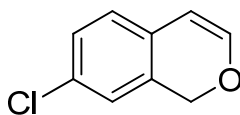

**2b**

### 7-chloro-1H-isochromene (2b)

Yellow solid (mp: 48-50°C).  $^1\text{H}$  NMR (300 MHz,  $\text{CDCl}_3$ ),  $\delta$  (ppm): 7.17 (dd,  $J = 7.9$ , 1.9 Hz, 1H), 6.98 (s, 1H), 6.88 (d,  $J = 7.9$  Hz, 1H), 6.57 (d,  $J = 5.7$  Hz, 1H), 5.77 (d,  $J = 5.7$  Hz, 1H), 5.01 (s, 2H).  $^{13}\text{C}$  NMR, DEPT (75 MHz,  $\text{CDCl}_3$ ),  $\delta$  (ppm): 146.4 (CH), 131.7 (C), 129.5 (C), 128.9 (C), 128.1 (CH), 124.2 (CH), 124.0 (CH), 104.7 (CH), 67.5 ( $\text{CH}_2$ ). MS,  $m/z$  (% relative intensity): 167 ( $\text{M}^+ + 1$ , 100), 166 (39), 139 (38), 141 (12), 131 (32). HRMS (CI) calculated for  $\text{C}_9\text{H}_8\text{ClO}$  [ $\text{M}^+ + 1$ ]: 167.0264; found: 167.0264.

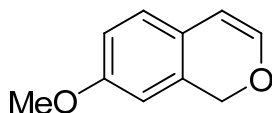

**2c**

### 7-methoxy-1H-isochromene (2c)

White solid (mp: 52-54°C).  $^1\text{H}$  NMR (300 MHz,  $\text{CDCl}_3$ ),  $\delta$  (ppm): 6.91 (d,  $J = 8.3$  Hz, 1H), 6.76 (dd,  $J = 8.3$ , 2.4 Hz, 1H), 6.58 (s, 1H), 6.51 (d,  $J = 5.7$  Hz, 1H), 5.78 (d,  $J = 5.7$  Hz, 1H), 5.03 (s, 2H), 3.79 (s, 3H).  $^{13}\text{C}$  NMR, DEPT (75 MHz,  $\text{CDCl}_3$ ),  $\delta$  (ppm): 158.6 (C), 144.1 (CH), 129.7 (C), 124.0 (CH), 123.2 (C), 112.9 (CH), 110.2 (CH), 105.0 (CH), 68.0 ( $\text{CH}_2$ ), 55.3 ( $\text{CH}_3$ ). MS,  $m/z$  (% relative intensity): 163 ( $\text{M}^+ + 1$ , 27), 149 (22), 137 (31), 123 (46), 109 (61), 95 (74), 83 (100). HRMS (ESI) calculated for  $\text{C}_{10}\text{H}_{11}\text{O}_2$  [ $\text{M}^+ + 1$ ]: 163.0756; found: 163.0754.

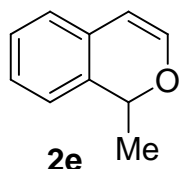

#### 1-methyl-1H-isochromene (2e)

Yellowish oil.  $^1\text{H}$  NMR (250 MHz,  $\text{CDCl}_3$ ),  $\delta$  ppm 7.25-7.09 (m, 2H), 7.04-6.89 (m, 2H), 6.51 (d,  $J = 5.7$  Hz, 1H), 5.76 (d,  $J = 5.7$  Hz, 1H), 5.21 (q,  $J = 6.5$  Hz, 1H), 1.59 (d,  $J = 6.5$  Hz, 3H).  $^{13}\text{C}$  NMR, DEPT (75 MHz,  $\text{CDCl}_3$ )  $\delta$  (ppm): 144.8 (CH), 132.4 (C), 129.7 (C), 127.8 (CH), 126.6 (CH), 123.3 (CH), 123.0 (CH), 104.7 (CH), 73.5 (CH), 19.7 ( $\text{CH}_3$ ). MS,  $m/z$  (% relative intensity): 147 ( $\text{M}^+ + 1$ , 100), 146 (24), 131 (13), 129 (15), 119 (35). HRMS (EI) calculated for  $\text{C}_{10}\text{H}_{10}\text{O}$  [ $\text{M}^+$ ]: 146.0732; found: 146.0732.

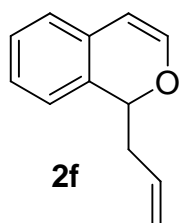

#### 1-allyl-1H-isochromene (2f)

Yellowish oil.  $^1\text{H}$  NMR (250 MHz,  $\text{CDCl}_3$ )  $\delta$  (ppm): 7.23-7.10 (m, 2H), 6.96 (d,  $J = 7.0$  Hz, 2H), 6.49 (d,  $J = 5.7$  Hz, 1H), 5.99-5.80 (m, 1H), 5.75 (d,  $J = 5.7$  Hz, 1H), 5.21-5.06 (m, 3H), 2.87-2.71 (m, 1H), 2.56-2.44 (m, 1H).  $^{13}\text{C}$  NMR, DEPT (75 MHz,  $\text{CDCl}_3$ )  $\delta$  (ppm): 144.1 (CH), 134.1 (CH), 130.8 (C), 129.6 (C), 127.9 (CH), 126.4 (CH), 124.2 (CH), 123.3 (CH), 117.6 ( $\text{CH}_2$ ), 104.6 (CH), 76.9 (CH), 38.5 ( $\text{CH}_2$ ). MS,  $m/z$  (% relative intensity): 173 ( $\text{M}^+ + 1$ , 18), 159 (13), 155 (11), 145 (26), 131 (100), 129 (5), 117 (5). HRMS (EI) calculated for  $\text{C}_{12}\text{H}_{12}\text{O}$  [ $\text{M}^+$ ]: 172.0888; found: 172.0888.

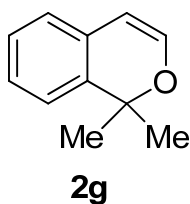

#### 1,1-dimethyl-1H-isochromene (2g)

Yellowish oil.  $^1\text{H}$  NMR (250 MHz,  $\text{CDCl}_3$ )  $\delta$  (ppm): 7.19-7.12 (m, 2H), 7.08-7.03 (m, 1H), 6.93 (dd,  $J = 6.1, 2.7$  Hz, 1H), 6.45 (d,  $J = 5.7$  Hz, 1H), 5.72 (d,  $J = 5.7$  Hz, 1H), 1.61 (s, 6H).  $^{13}\text{C}$  NMR, DEPT (75 MHz,  $\text{CDCl}_3$ )  $\delta$  (ppm): 143.4 (CH), 137.0 (C), 136.0 (C), 127.4 (CH), 126.8 (CH), 123.4 (CH), 122.6 (CH), 104.0 (CH), 77.9 (C), 27.3 ( $2 \times \text{CH}_3$ ). MS,  $m/z$  (% relative intensity): 161 ( $\text{M}^+ + 1$ , 100), 160 (42), 145 (29), 143 (86), 133 (21). HRMS (EI) calculated for  $\text{C}_{11}\text{H}_{12}\text{O}$  [ $\text{M}^+$ ]: 160.0888; found: 160.0888.

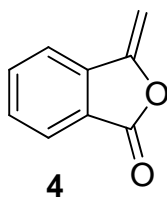

**3-methyleneisobenzofuran-1(3H)-one (4)**

Brown oil.  $^1\text{H}$  NMR (300 MHz,  $\text{CDCl}_3$ ),  $\delta$  (ppm): 7.92 (d,  $J = 7.6$  Hz, 1H), 7.73 (d,  $J = 3.7$  Hz, 2H), 7.63-7.54 (m, 1H), 5.24 (s, 2H).  $^{13}\text{C}$  NMR, DEPT (75 MHz,  $\text{CDCl}_3$ ),  $\delta$  (ppm): 169.6 (C), 166.8 (C), 151.8 (C), 139.1 (C), 134.4 (CH), 130.4 (CH), 125.4 (CH), 120.6 (CH), 91.2 ( $\text{CH}_2$ ). MS,  $m/z$  (% relative intensity): 147 ( $\text{M}^+ + 1$ , 100), 131 (1), 103 (2). IR (KBr),  $\text{cm}^{-1}$ : 2924, 1774, 1657. HRMS (CI) calculated for  $\text{C}_9\text{H}_7\text{O}_2$  [ $\text{M}^+ + 1$ ]: 147.0446; found: 147.0446.

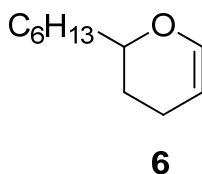

**2-hexyl-3,4-dihydro-2H-pyran (6)**

Dark brown oil.  $^1\text{H}$  NMR (250 MHz,  $\text{CDCl}_3$ ),  $\delta$  (ppm): 6.33 (d,  $J = 6.2$  Hz, 1H), 4.66-4.56 (m, 1H), 3.78-3.65 (m, 1H), 2.05-1.20 (m, 14H), 0.84 (t,  $J = 6.7$  Hz, 3H).  $^{13}\text{C}$  NMR, DEPT (75 MHz,  $\text{CDCl}_3$ ),  $\delta$  (ppm): 143.8 (CH), 100.4 (CH), 75.2 (CH), 35.3 ( $\text{CH}_2$ ), 31.9 ( $\text{CH}_2$ ), 29.3 ( $\text{CH}_2$ ), 27.8 ( $\text{CH}_2$ ), 25.3 ( $\text{CH}_2$ ), 22.6 ( $\text{CH}_2$ ), 19.9 ( $\text{CH}_2$ ), 14.1 ( $\text{CH}_3$ ). MS,  $m/z$  (% relative intensity): 169 ( $\text{M}^+ + 1$ , 100), 151 (45), 141 (31), 137 (25), 123 (35), 109 (43), 97 (50), 83 (78), 71 (91). HRMS (CI) calculated for  $\text{C}_{11}\text{H}_{21}\text{O}$  [ $\text{M}^+ + 1$ ]: 169.1592; found: 169.1592

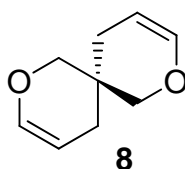

**(±)-2,8-dioxaspiro[5.5]undeca-3,9-diene (8)**

Brown oil.  $^1\text{H}$  NMR (300 MHz,  $\text{CDCl}_3$ ),  $\delta$  (ppm): 6.36 (td,  $J = 6.1, 2.0$  Hz, 2H), 4.67 (td,  $J = 6.1, 3.7$  Hz, 2H), 3.82 (d,  $J = 10.7$  Hz, 2H), 3.62 (d,  $J = 10.7$  Hz, 2H), 1.82 (bs, 4H).  $^{13}\text{C}$  NMR, DEPT (75 MHz,  $\text{CDCl}_3$ ),  $\delta$  (ppm): 143.3 (CH), 98.6 (CH), 69.2 ( $\text{CH}_2$ ), 30.0 (C), 29.2 ( $\text{CH}_2$ ). MS,  $m/z$  (% relative intensity): 153 ( $\text{M}^+ + 1$ , 91), 175 (68), 123 (19), 107 (79), 97 (100). HRMS (CI) calculated for  $\text{C}_9\text{H}_{13}\text{O}_2$  [ $\text{M}^+ + 1$ ]: 153.0916; found: 153.0916.

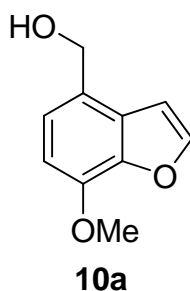

**(7-methoxybenzofuran-4-yl)methanol (10a)**

Yellowish solid (mp: 61-63°C).  $^1\text{H}$  NMR (250 MHz,  $\text{CDCl}_3$ ),  $\delta$  (ppm): 7.60 (d,  $J = 2.1$  Hz, 1H), 7.06 (d,  $J = 8.0$  Hz, 1H), 6.86 (d,  $J = 2.1$  Hz, 1H), 6.70 (d,  $J = 8.0$  Hz, 1H), 4.78 (s, 2H), 3.96 (s, 3H), 1.94 (s, 1H).  $^{13}\text{C}$  NMR, DEPT (75 MHz,  $\text{CDCl}_3$ ),  $\delta$  (ppm): 145.2 (C), 145.1 (CH), 144.3 (C), 127.7 (C), 125.8 (C), 122.3 (CH), 105.8 (CH), 105.5 (CH), 63.3 ( $\text{CH}_2$ ), 56.0 ( $\text{CH}_3$ ). MS,  $m/z$  (% relative intensity): 179 ( $\text{M}^+ + 1$ , 45), 177 (37), 163 (93), 161 (100), 149 (35). HRMS (EI) calculated for  $\text{C}_{10}\text{H}_{10}\text{O}_3$  [ $\text{M}^+$ ]: 178.0630; found: 178.0630.

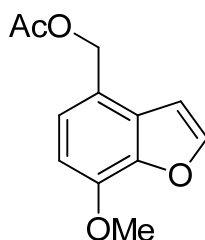

**(7-methoxybenzofuran-4-yl)methyl acetate**

$^1\text{H}$  NMR (250 MHz,  $\text{CDCl}_3$ ),  $\delta$  (ppm): 7.67 (d,  $J = 2.1$  Hz, 1H), 7.18 (d,  $J = 8.1$  Hz, 1H), 6.87 (d,  $J = 2.1$  Hz, 1H), 6.78 (d,  $J = 8.1$  Hz, 1H), 5.29 (s, 2H), 4.02 (s, 3H), 2.09 (s, 3H).

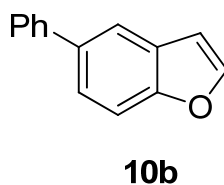

**5-phenylbenzofuran (10b)**

White solid (mp: 58-60°C).  $^1\text{H}$  NMR (400 MHz,  $\text{CDCl}_3$ ),  $\delta$  (ppm): 7.81-7.79 (bs, 1H), 7.66 (d,  $J = 2.2$  Hz, 1H), 7.64 (t,  $J = 1.6$  Hz, 1H), 7.62 (d,  $J = 0.9$  Hz, 1H), 7.59-7.52 (m,  $J = 8.55$ , 2H), 7.48-7.43 (m, 2H), 7.36 (dd,  $J = 4.84$ , 3.60 Hz, 1H), 6.83 (dd,  $J = 2.17$ , 0.88 Hz, 1H).  $^{13}\text{C}$  NMR, DEPT (75 MHz,  $\text{CDCl}_3$ ),  $\delta$  (ppm): 154.5 (C), 145.5 (CH), 141.6 (C), 136.5 (C), 128.7 (2xCH), 128.0 (C), 127.4 (2xCH), 126.8 (CH), 123.9 (CH), 119.7 (CH), 111.5 (CH), 106.8 (CH). MS,  $m/z$  (% relative intensity): 195 ( $\text{M}^+ + 1$ , 100), 194 (9). HRMS (CI) calculated for  $\text{C}_{14}\text{H}_{11}\text{O}$  [ $\text{M}^+ + 1$ ]: 195.0810; found: 195.0810.

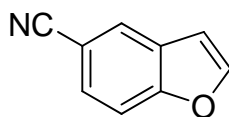

**10c**

**1-benzofuran-5-carbonitrile (10c)**

White solid (mp: 81-82°C).  $^1\text{H}$  NMR (400 MHz,  $\text{CDCl}_3$ ),  $\delta$  (ppm): 7.95 (s, 1H), 7.74 (d,  $J = 2.2$  Hz, 1H), 7.65-7.47 (bs, 2H), 6.84 (d,  $J = 2.2$  Hz, 1H).  $^{13}\text{C}$  NMR, DEPT (75 MHz,  $\text{CDCl}_3$ ),  $\delta$  (ppm): 156.4 (C), 147.1 (CH), 128.0 (C), 127.9 (CH), 126.3 (CH), 119.4 (C), 112.6 (CH), 106.7 (C), 106.6 (CH). MS,  $m/z$  (% relative intensity): 144 ( $\text{M}^+ + 1$ , 100), 137 (30), 123 (46), 109 (62), 95 (74), 83 (98). HRMS (CI) calculated for  $\text{C}_9\text{H}_6\text{NO}$  [ $\text{M}^+ + 1$ ]: 144.0449; found: 144.0449.

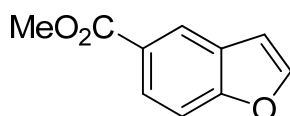

**10d**

**Methyl benzofuran-5-carboxylate (10d)**

Yellow solid (mp: 69-70°C).  $^1\text{H}$  NMR (250 MHz,  $\text{CDCl}_3$ ),  $\delta$  (ppm): 8.35 (d,  $J = 1.3$  Hz, 1H), 8.03 (dd,  $J = 8.7, 1.6$  Hz, 1H), 7.68 (d,  $J = 2.1$  Hz, 1H), 7.52 (d,  $J = 8.7$  Hz, 1H), 6.84 (d,  $J = 1.3$  Hz, 1H), 3.94 (s, 3H).  $^{13}\text{C}$  NMR, DEPT (75 MHz,  $\text{CDCl}_3$ ),  $\delta$  (ppm): 167.2 (CO), 157.4 (C), 146.2 (CH), 127.5 (C), 126.0 (CH), 125.1 (C), 123.7 (CH), 111.2 (CH), 107.1 (CH), 52.1 ( $\text{CH}_3$ ). MS,  $m/z$  (% relative intensity): 177 ( $\text{M}^+ + 1$ , 100), 145 (7), 133 (5), 105 (5). HRMS (ESI) calculated for  $\text{C}_{10}\text{H}_9\text{O}_3$  [ $\text{M}^+ + 1$ ]: 177.0552; found: 177.0552.

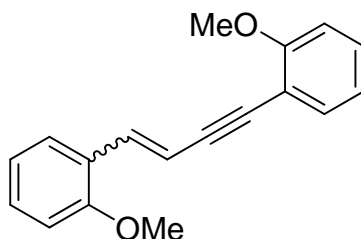

**12**

**1,1'-but-1-en-3-yne-1,4-diylbis(2-methoxybenzene) (12)<sup>7</sup>**

Dark brown oil.  $^1\text{H}$  NMR (400 MHz,  $\text{CDCl}_3$ )  $\delta$  (ppm): 7.44 (td,  $J = 7.6, 1.5$  Hz), 7.36 (d,  $J = 16.4$  Hz), 7.29-7.22 (m), 7.16 (dd,  $J = 13.4, 6.2$  Hz), 7.06 (t,  $J = 7.31$ ), 6.97-6.84 (m), 6.53 (d,  $J = 16.4$  Hz), 5.98 (d,  $J = 12.1$  Hz), 3.90 (s), 3.86 (s).  $^{13}\text{C}$  NMR, DEPT (75 MHz,  $\text{CDCl}_3$ ),  $\delta$  (ppm): 159.7 (C), 157.0 (C), 136.3 (CH), 133.5 (CH), 133.4 (CH), 129.5 (CH), 129.4 (CH), 128.2 (CH), 126.8 (CH), 125.5 (C), 120.7 (CH), 120.5 (CH), 120.2 (CH), 112.8 (C), 111.0 (CH), 110.6 (CH), 109.0 (CH), 93.8 (C), 87.5 (C), 85.1 (CH), 55.8 ( $\text{CH}_3$ ), 55.4 ( $\text{CH}_3$ ). MS,  $m/z$  (% relative intensity): 265 ( $\text{M}^+ + 1$ , 100), 250 (7), 135 (5), 121 (10'), 109 (6).

<sup>7</sup> Bassetti, M.; Pasquini, C.; Raneri, A.; Rosato, D. *J. Org. Chem.* **2007**, 72, 4558

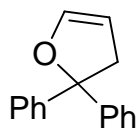

**2,2-diphenyl-2,3-dihydrofuran**

White oil.  $^1\text{H}$  NMR (400 MHz,  $\text{CDCl}_3$ ),  $\delta$  (ppm): 7.60-7.08 (m, 10H), 6.51 (d,  $J = 2.8$  Hz, 1H), 5.00-4.89 (m, 1H), 3.33 (t,  $J = 2.4$ , 2H).  $^{13}\text{C}$  NMR, DEPT (75 MHz,  $\text{CDCl}_3$ ),  $\delta$  (ppm): 146.2 (CH), 144.2 (2xC), 128.2 (4xCH), 127.1 (2xCH), 125.8 (4xCH), 99.0 (CH), 90.8 (C), 43.8 ( $\text{CH}_2$ ). MS,  $m/z$  (% relative intensity): 223 ( $\text{M}^+ + 1$ , 94), 205 (83), 193 (15), 145 (100), 105 (40). HRMS (ESI) calculated for  $\text{C}_{16}\text{H}_{15}\text{O}$  [ $\text{M}^+ + 1$ ]: 223.1113; found: 223.1117.

## VII. Spectra

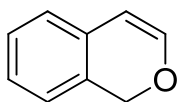

**2a**

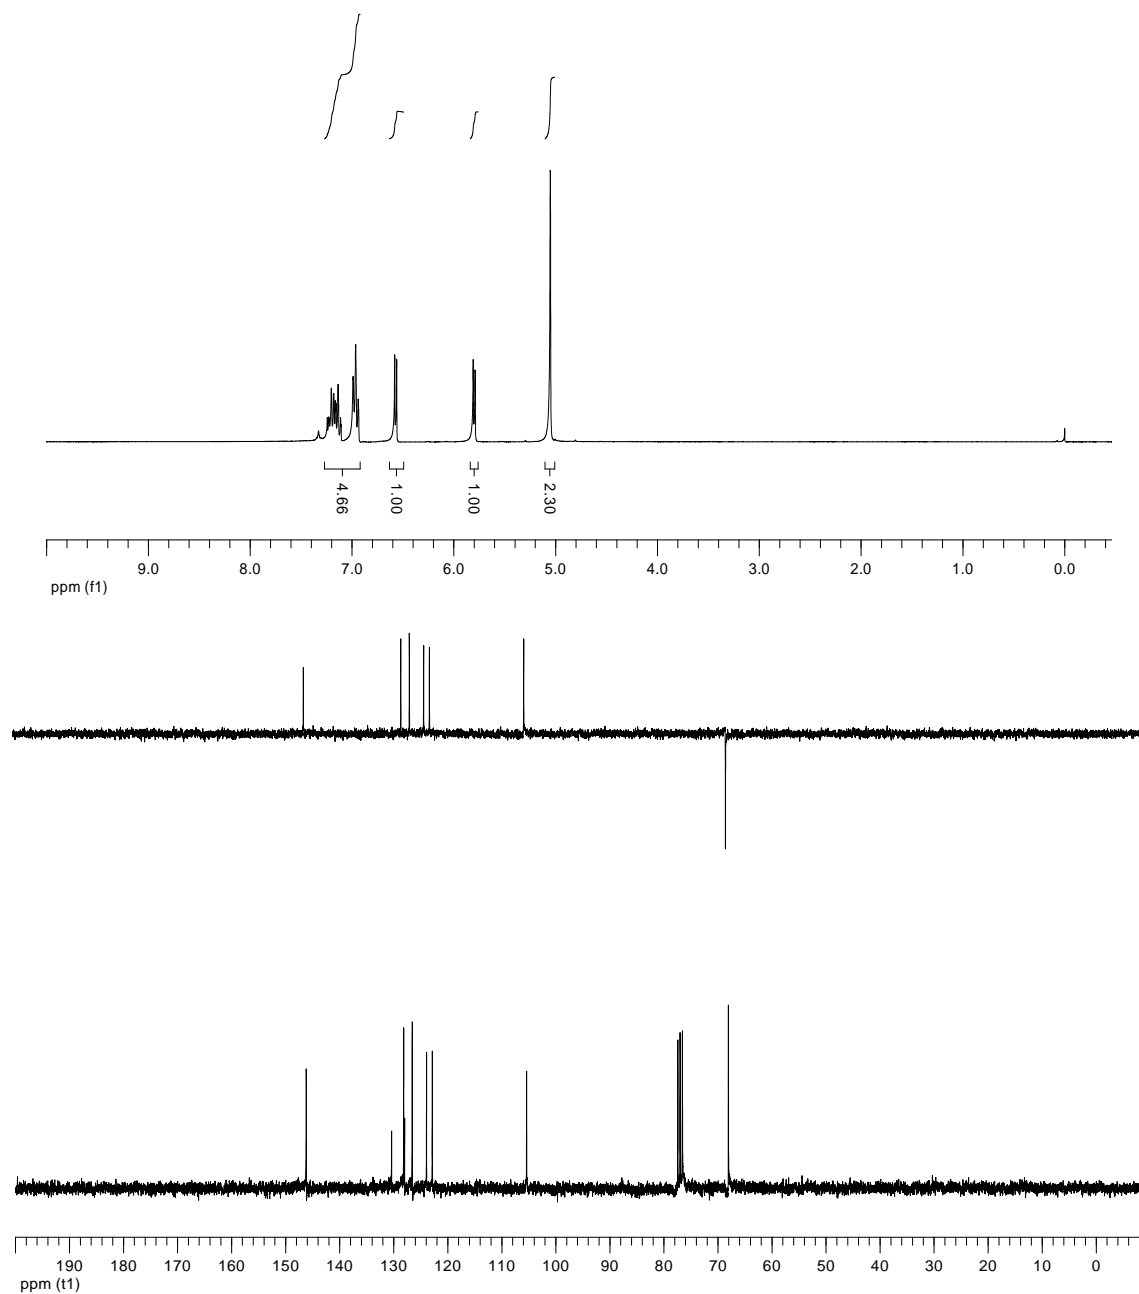

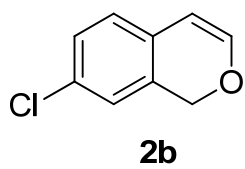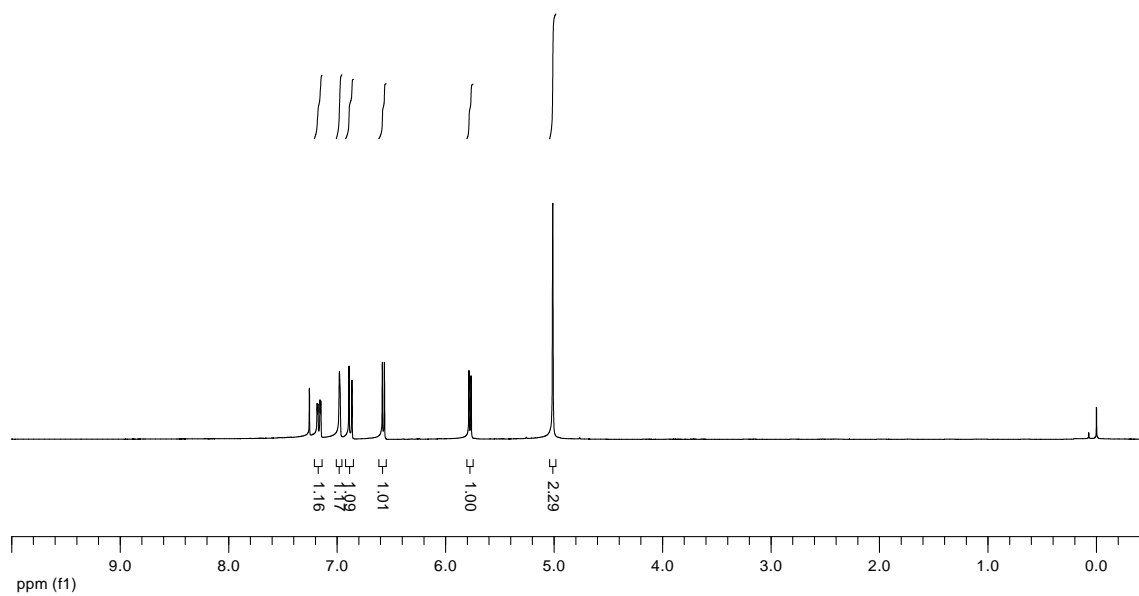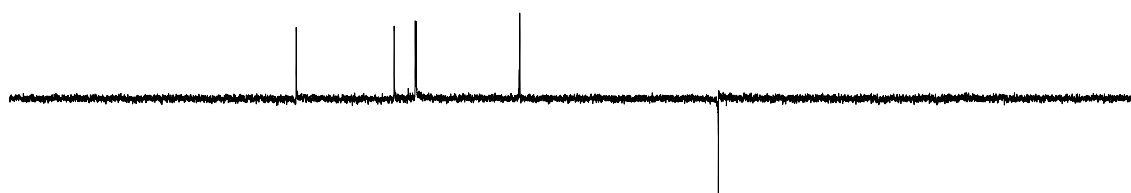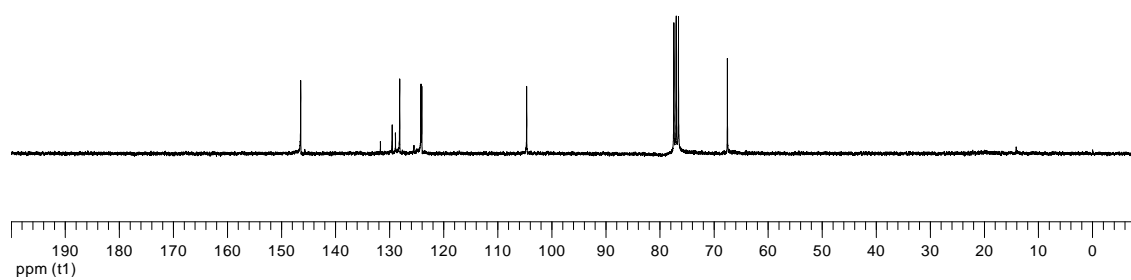

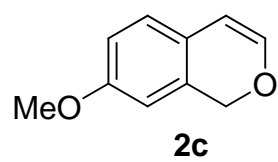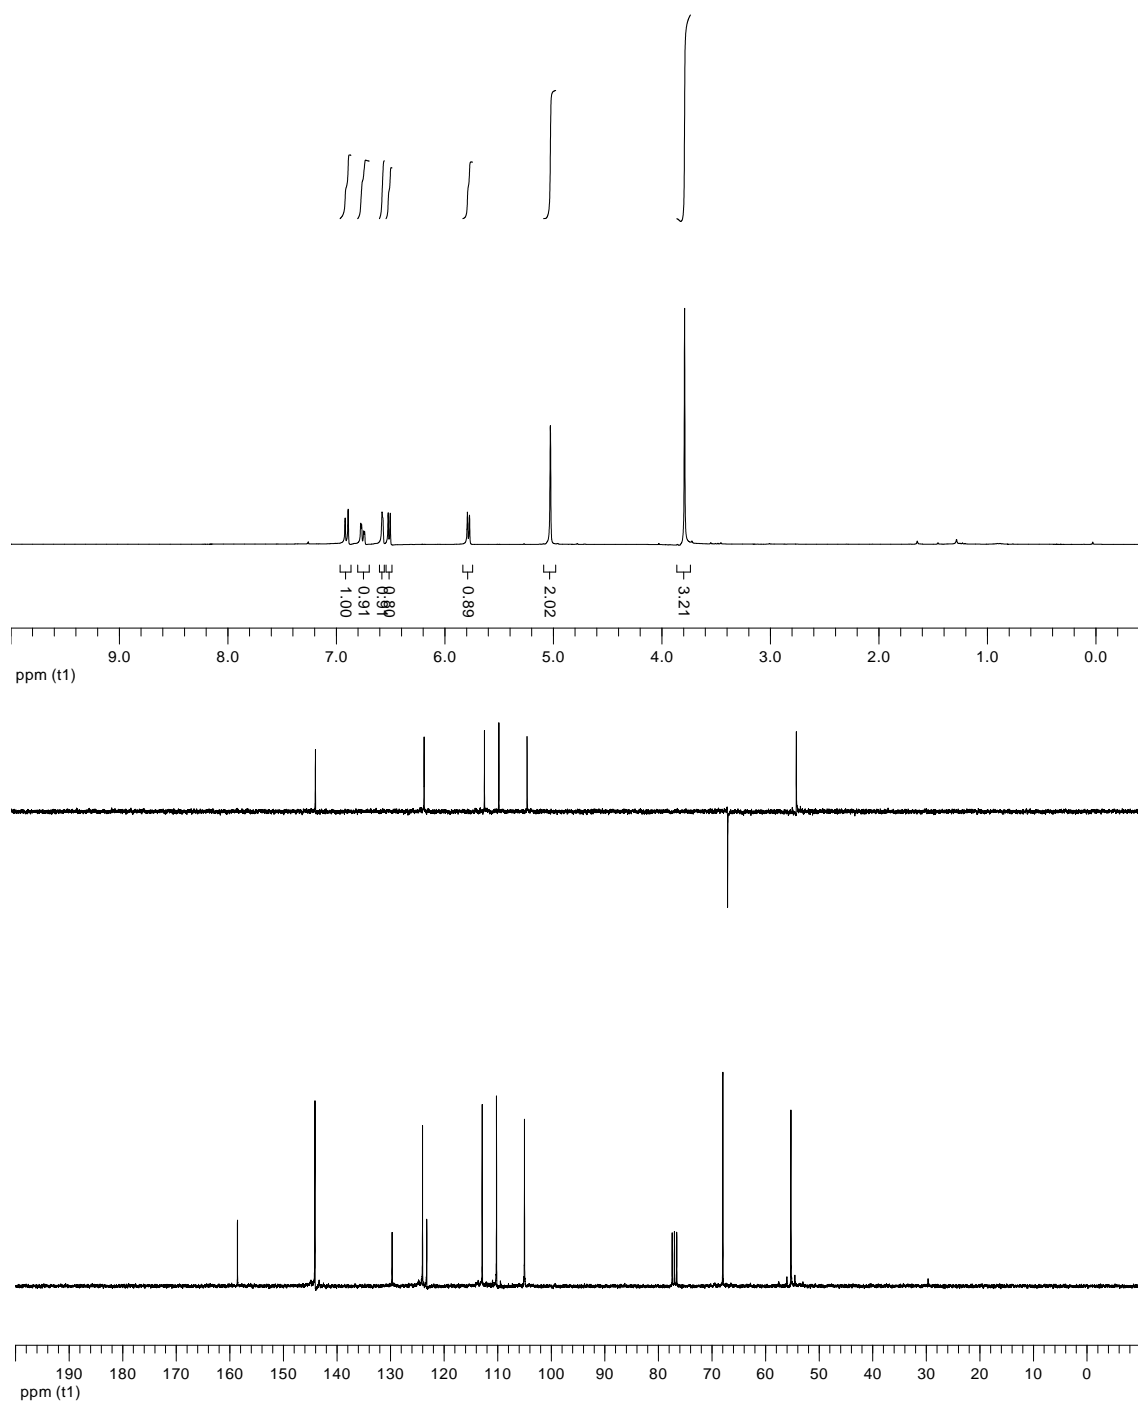

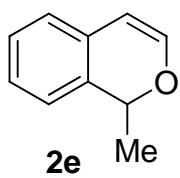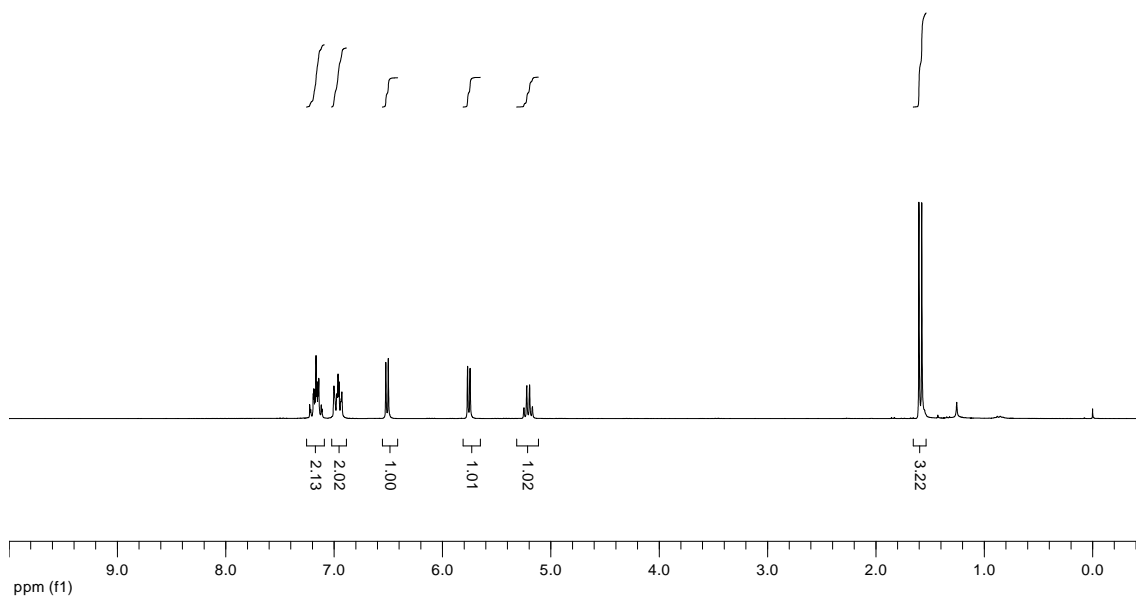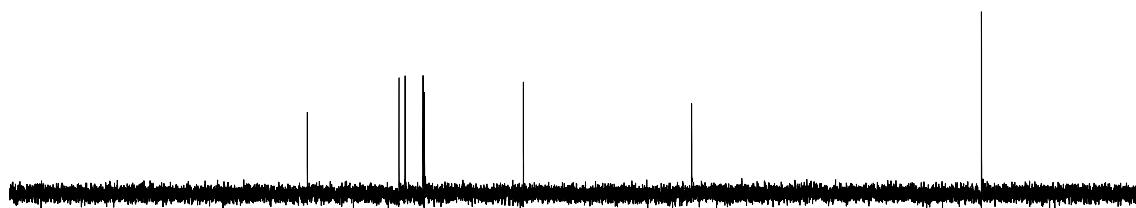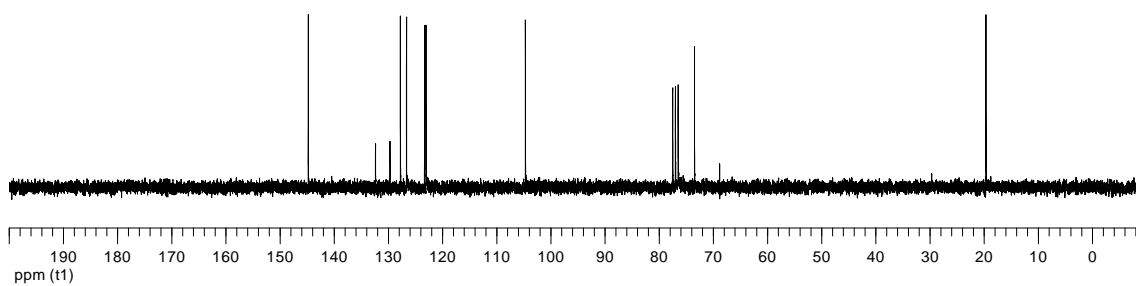

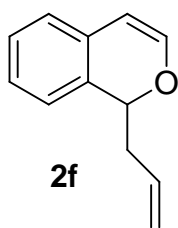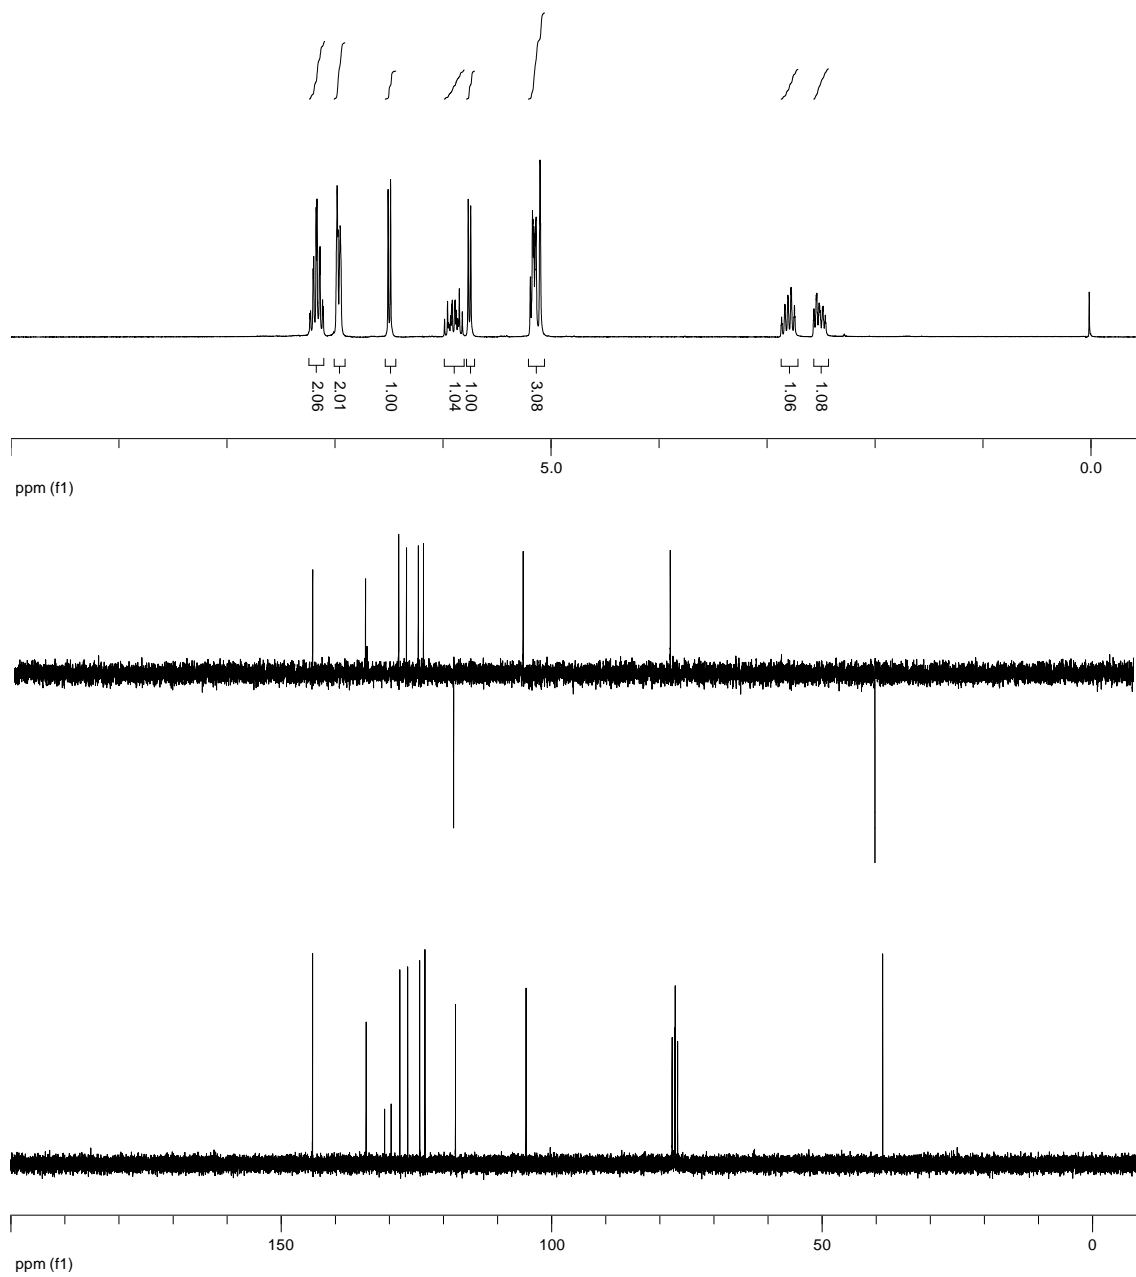

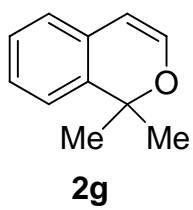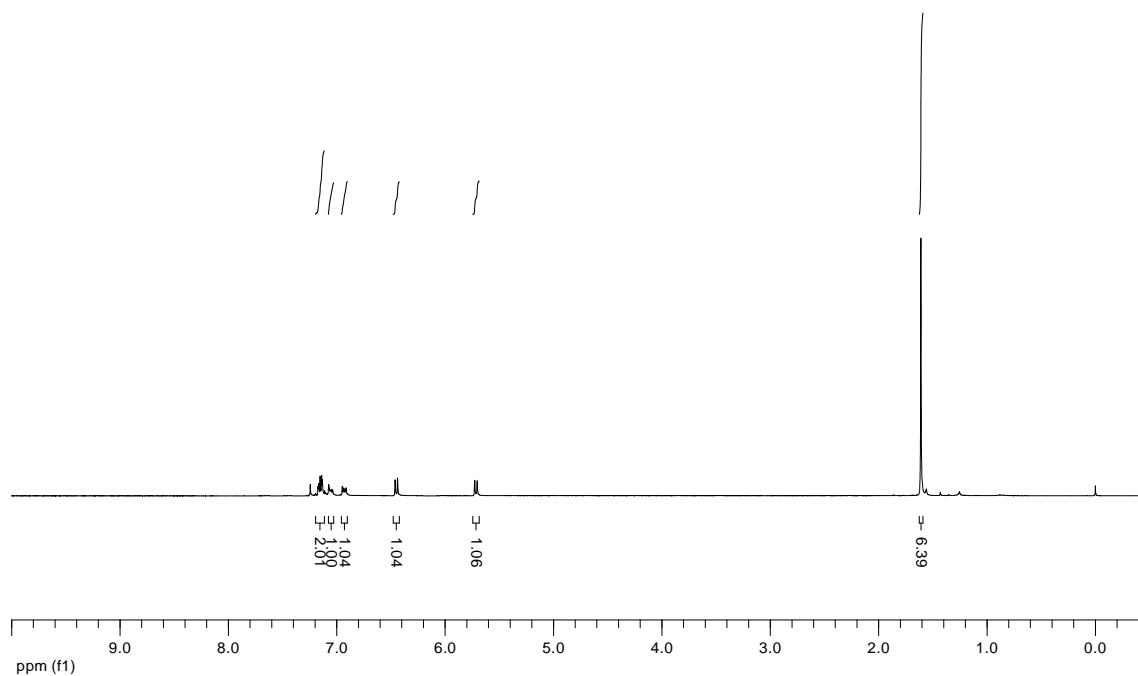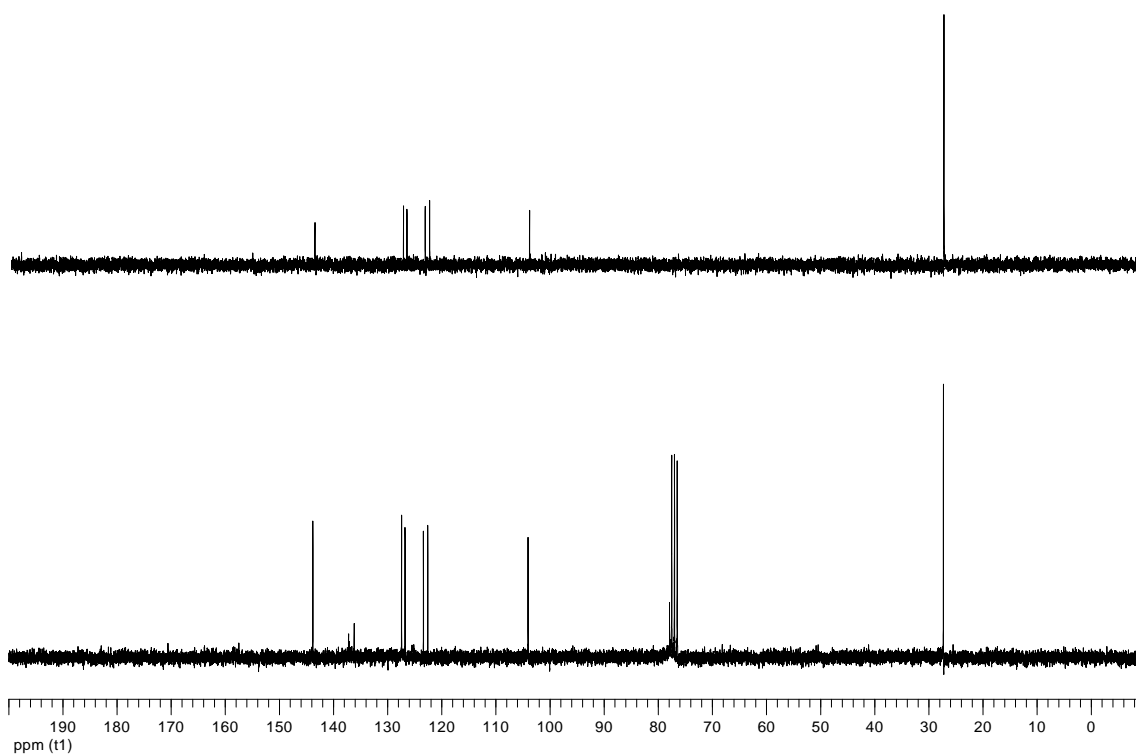

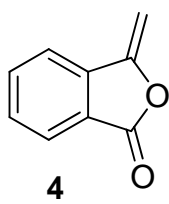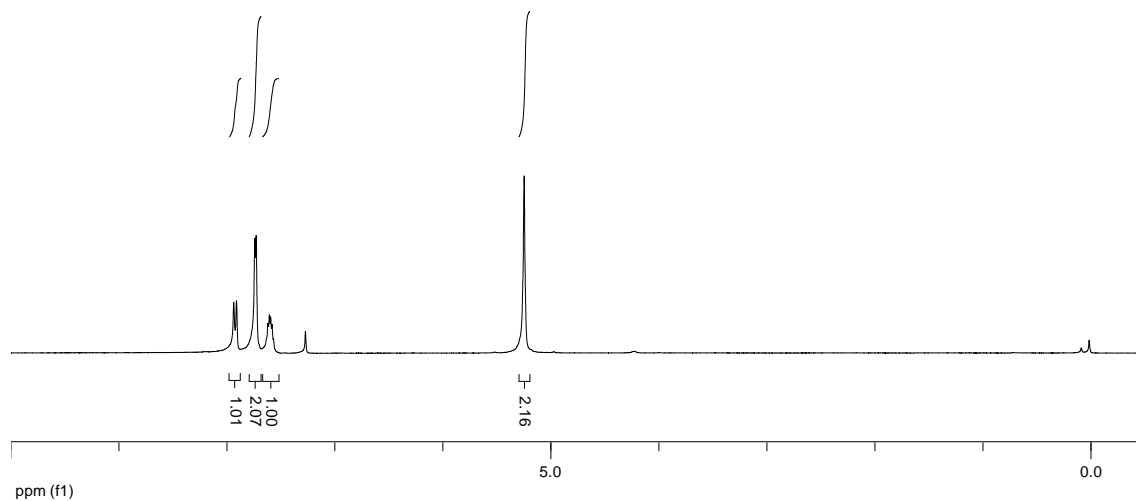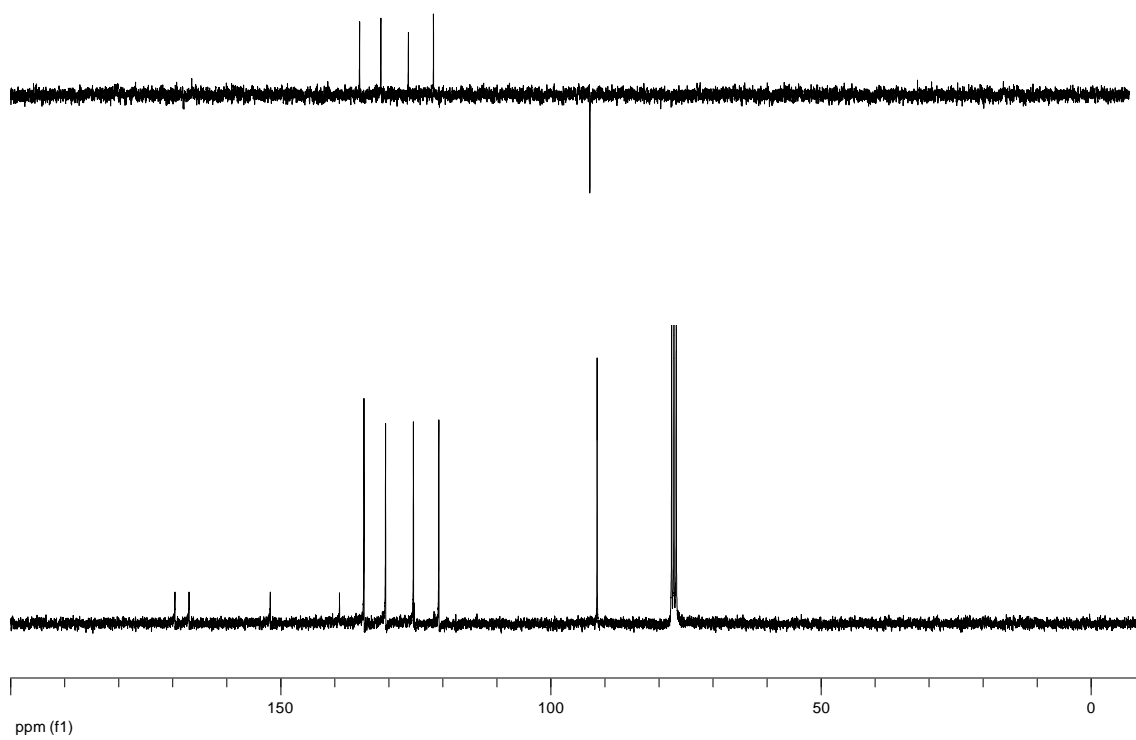

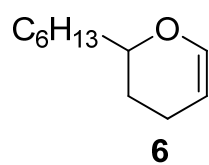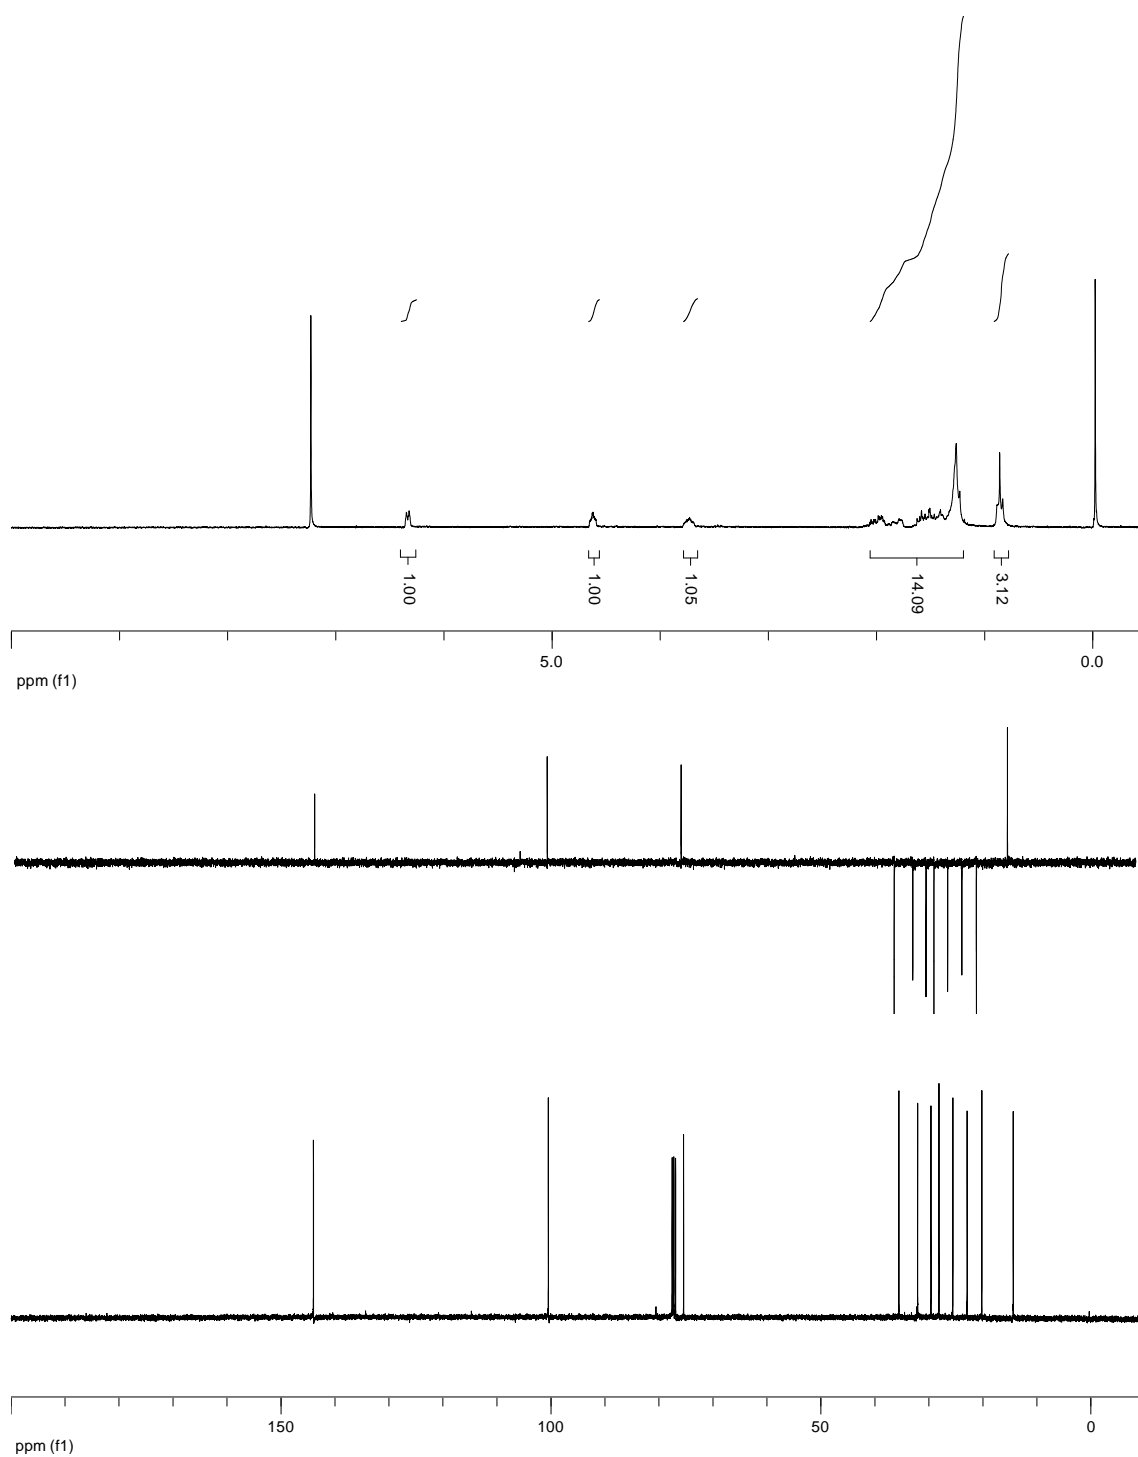

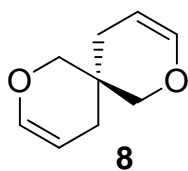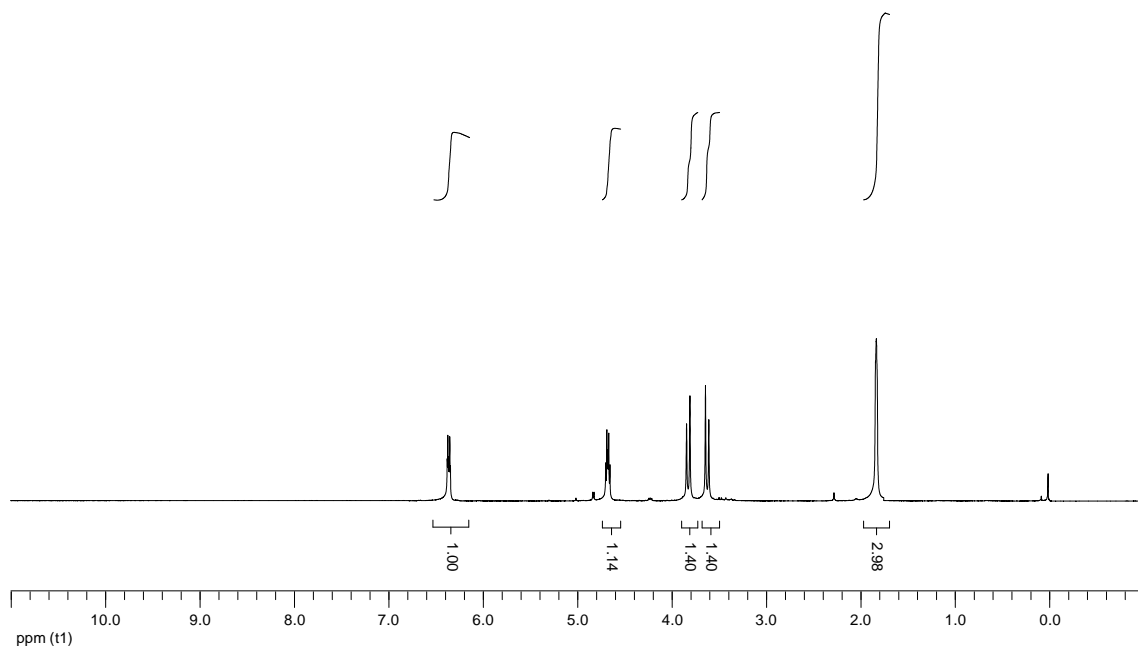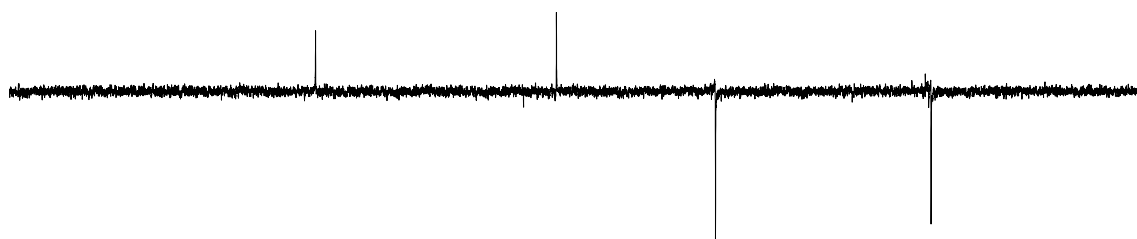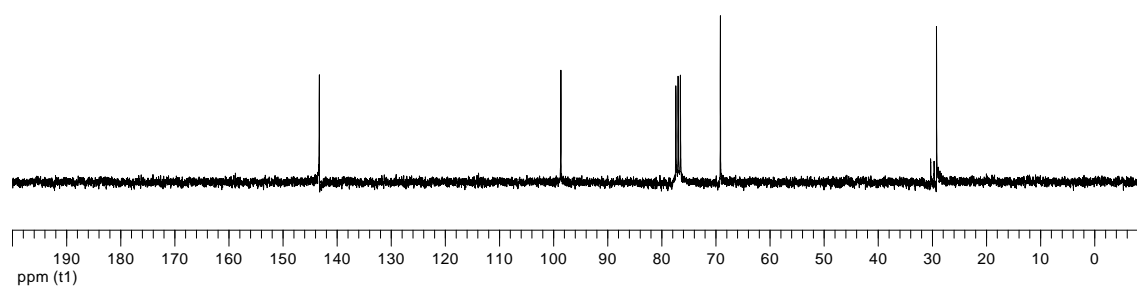

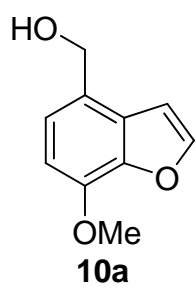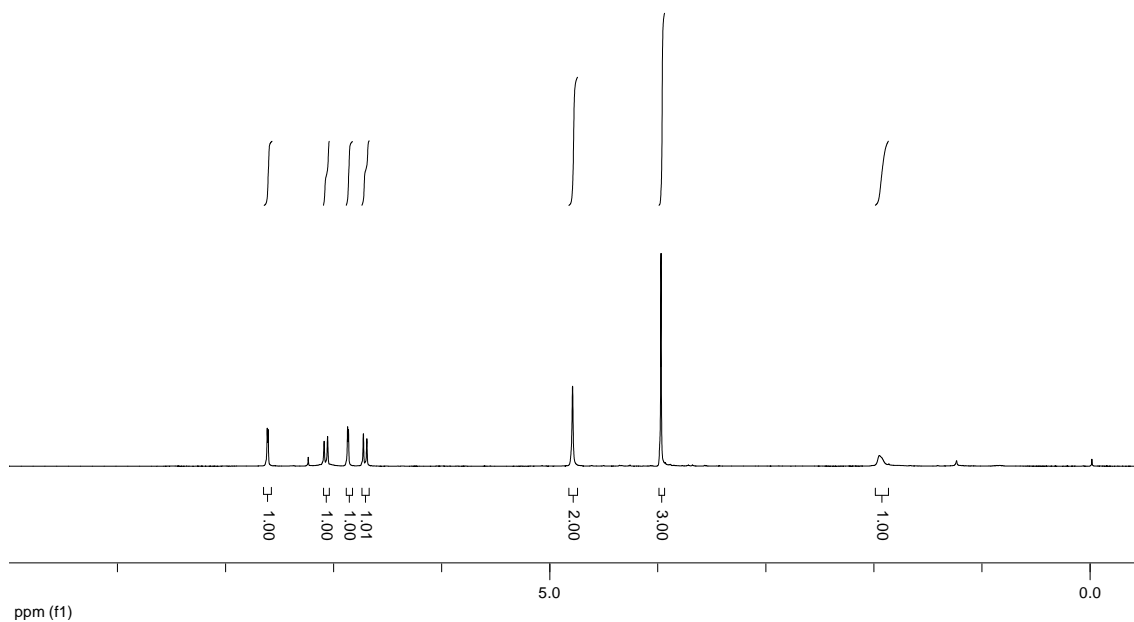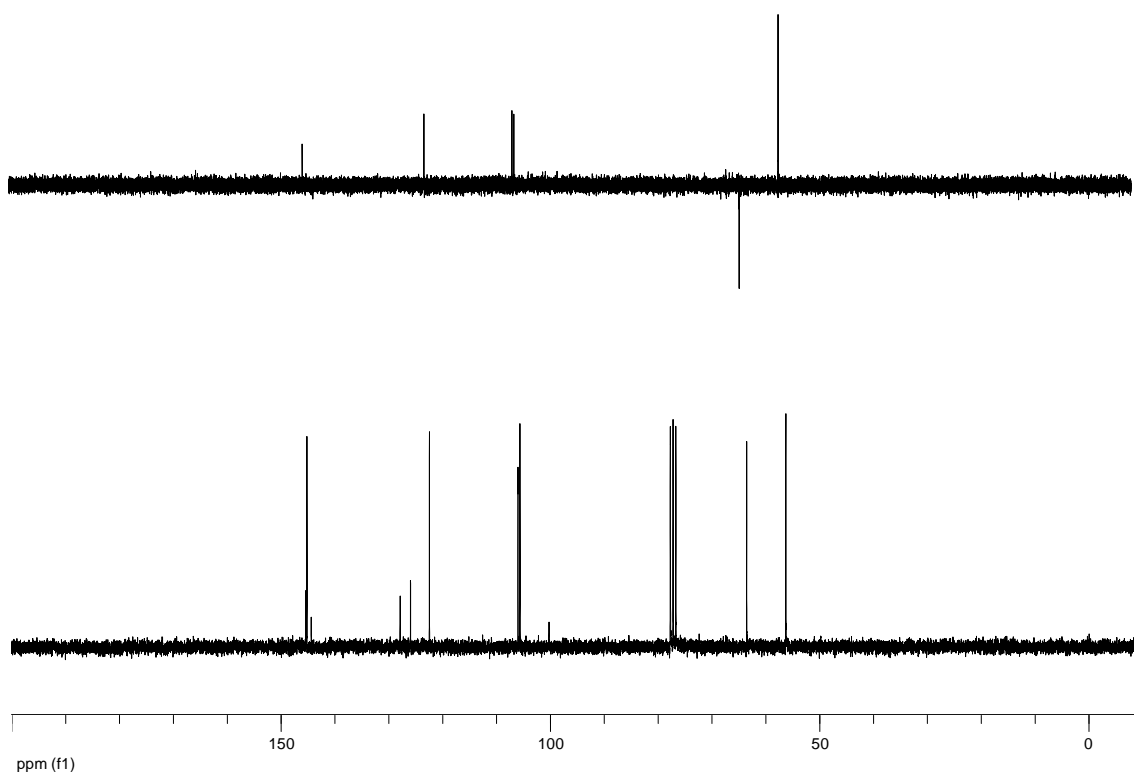

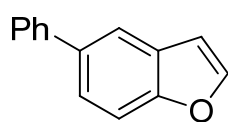

**10b**

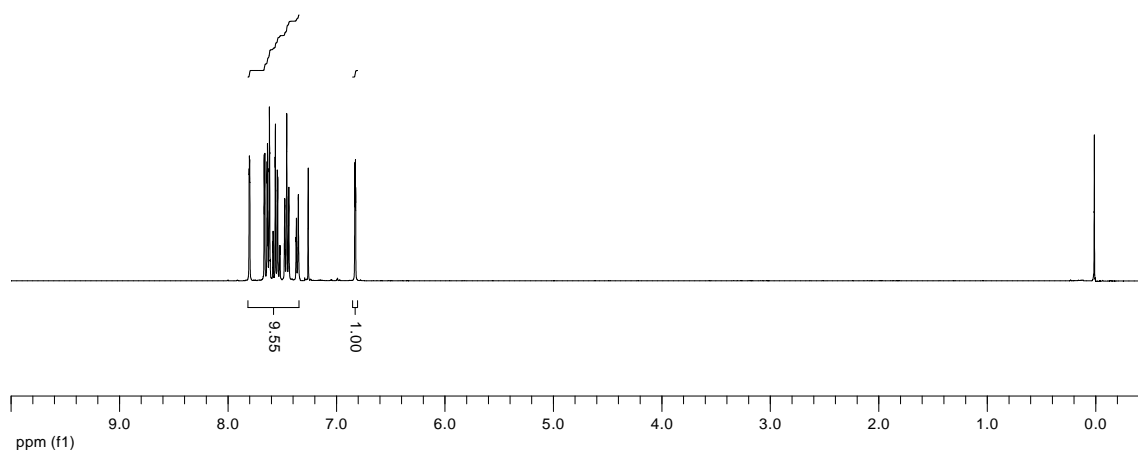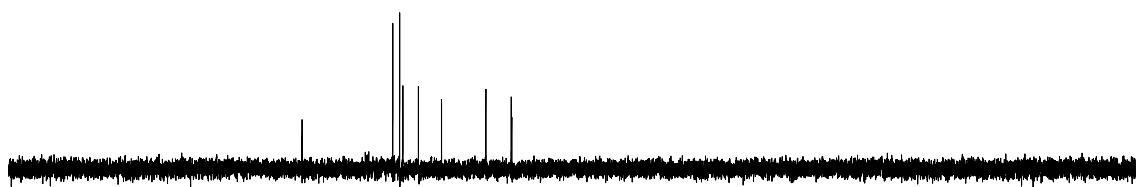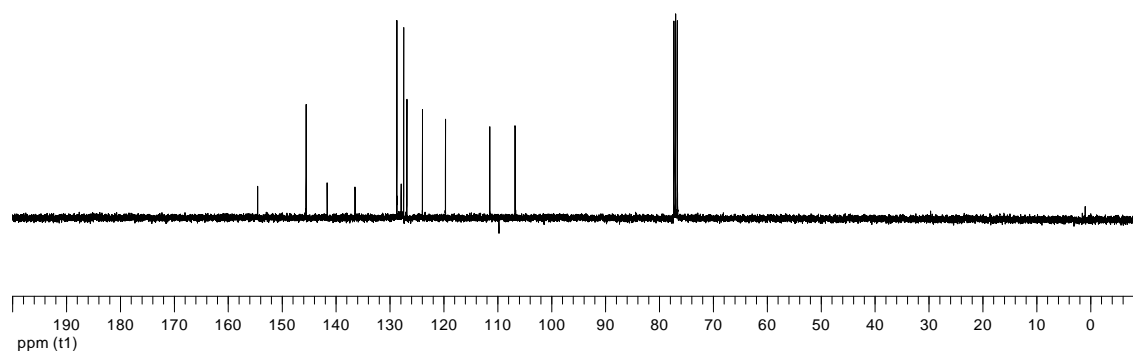

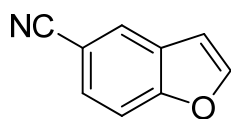

**10c**

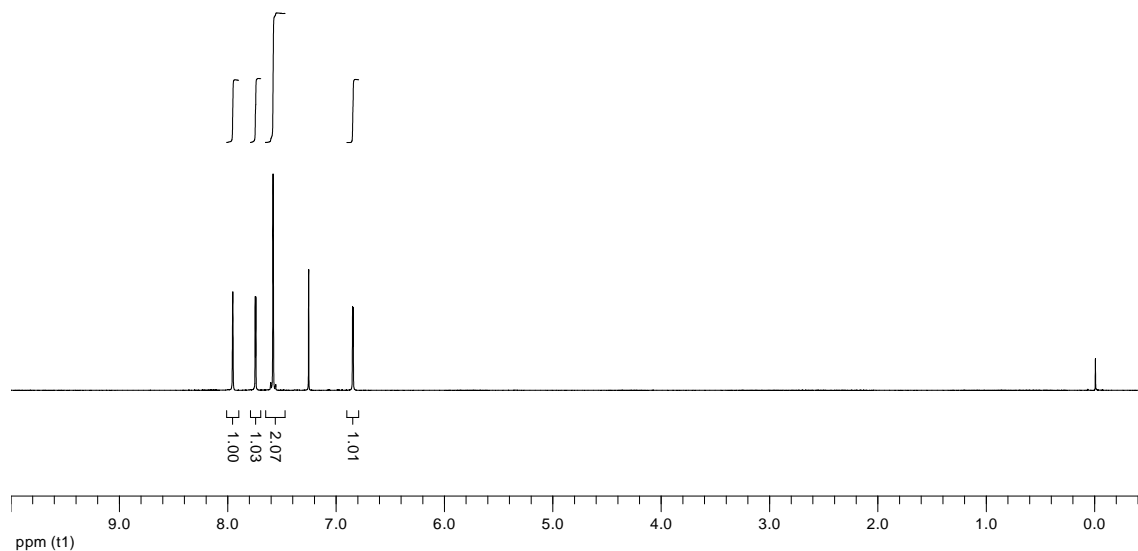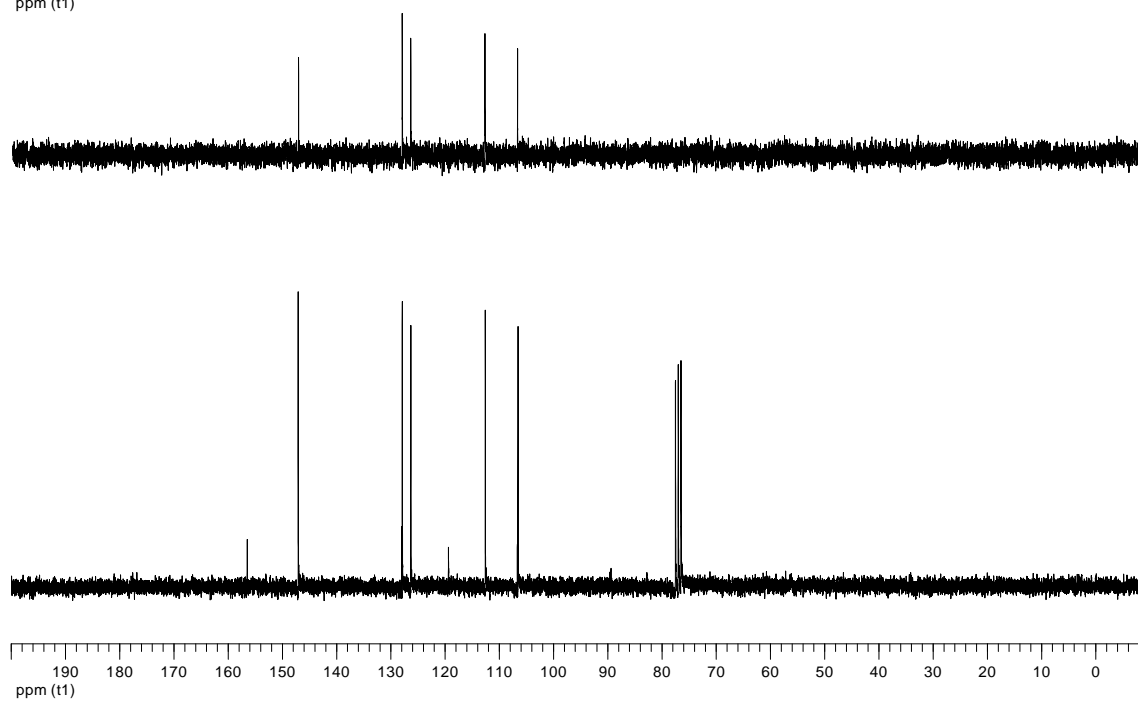

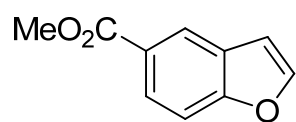

**10d**

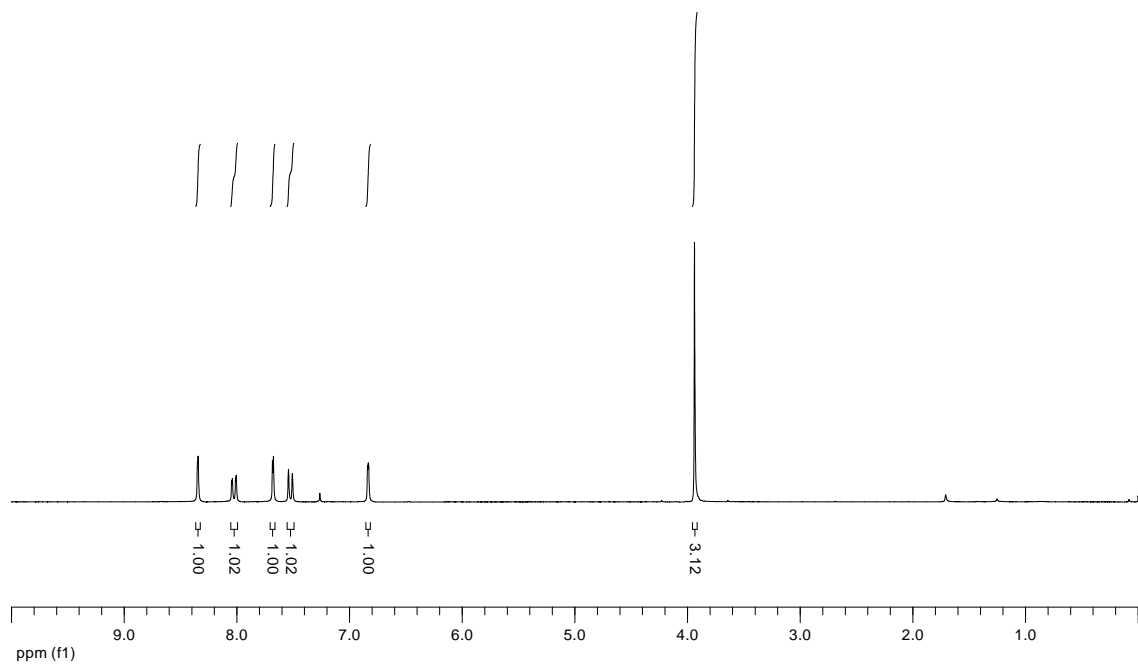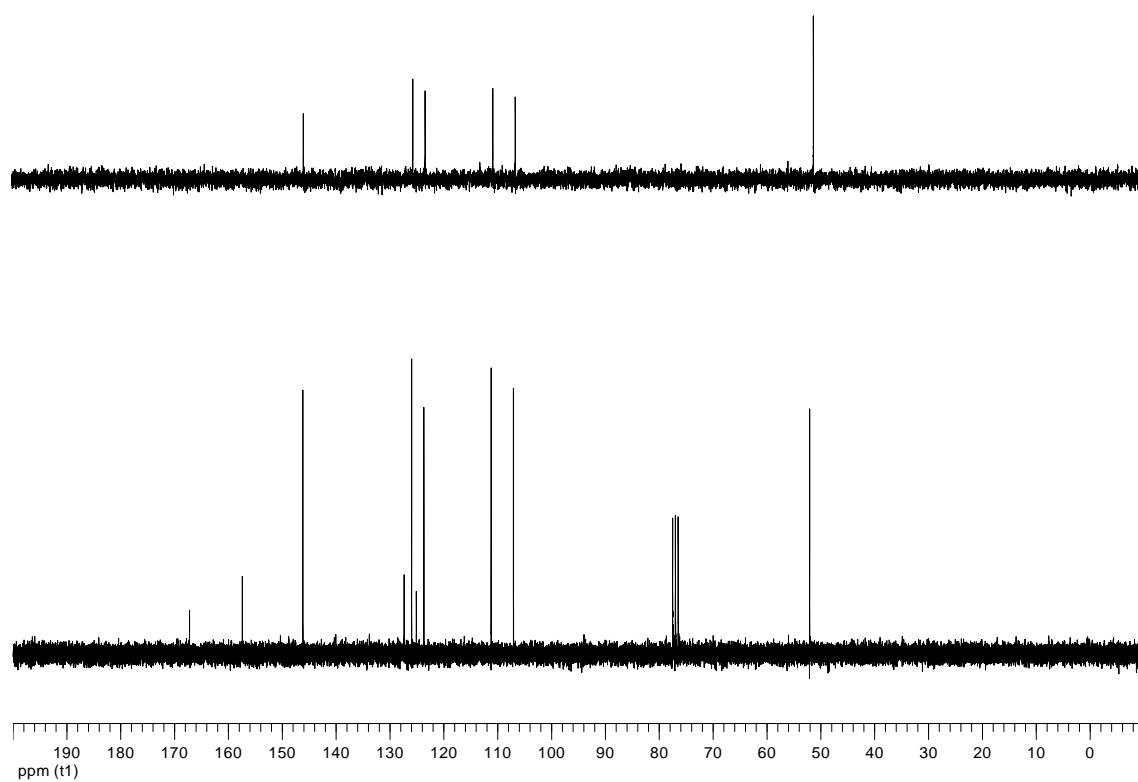

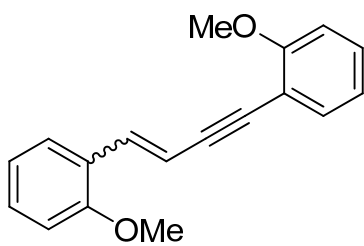

**12** (E/Z: 9/1)

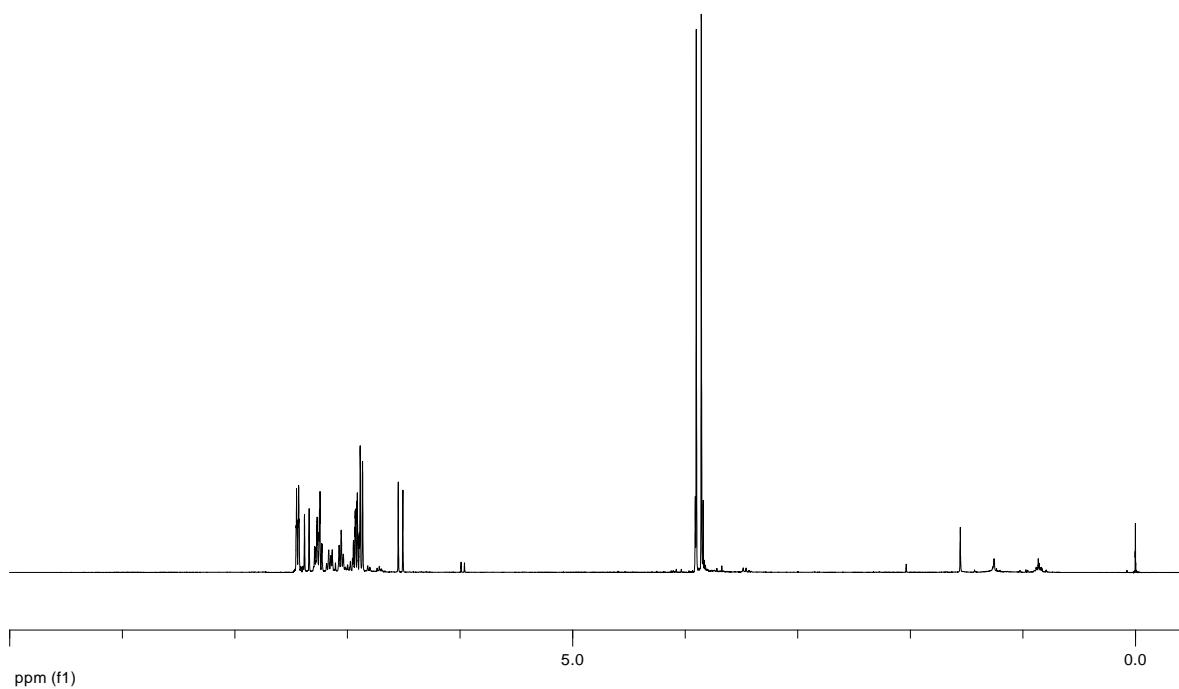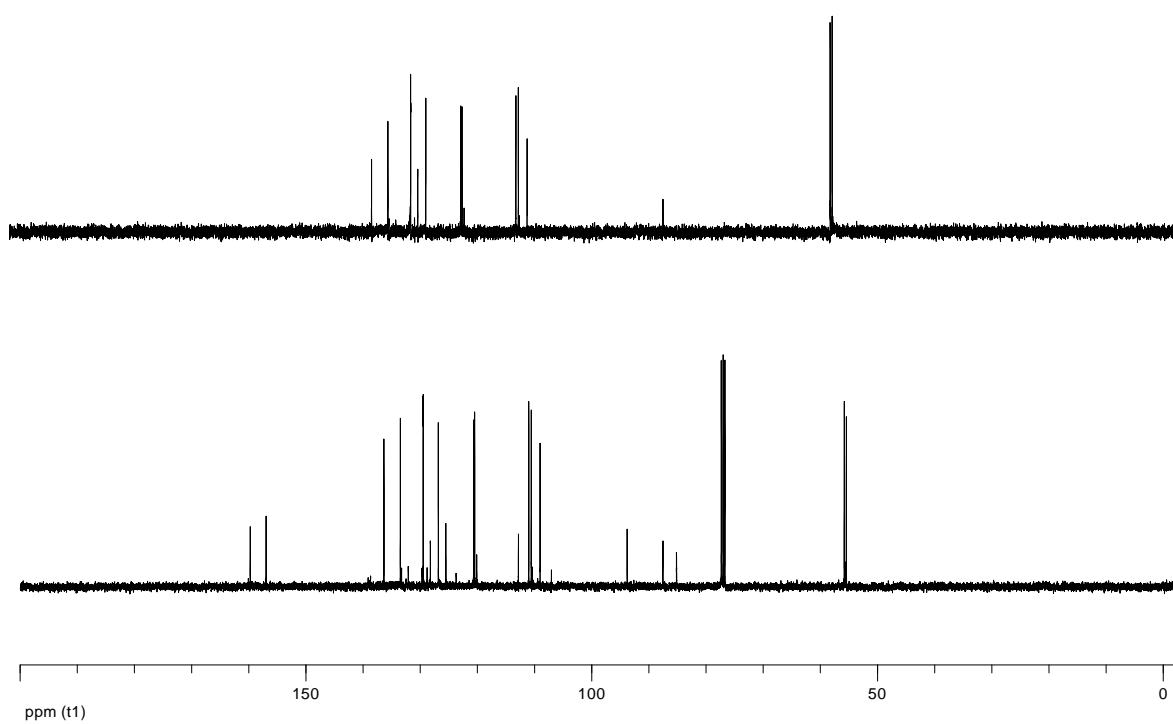

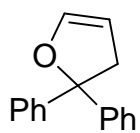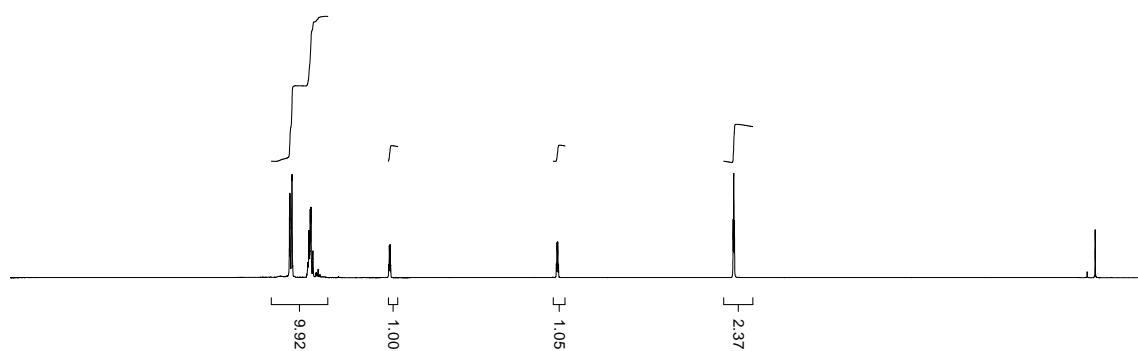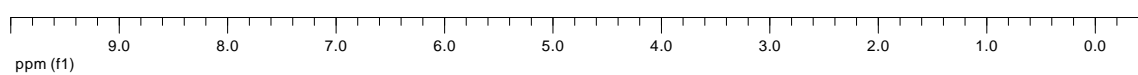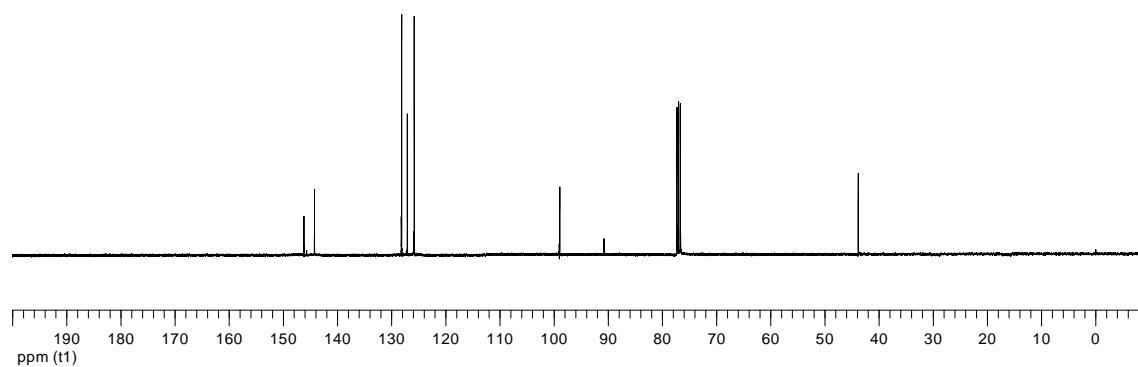

Supplement: Supplementary file 1 [file 4506799]
